# Supplementary material for: The training and support needs of 22 programme directors of community-based childhood obesity interventions based on the EPODE approach: an online survey across programmes in 18 countries
Source: PubMed Central journal article supplement (PMC7491184; doi:10.1186/s12913-020-05709-1), 2020-09-15
Supplement: 12913_2020_5709_MOESM1_ESM.pdf [file 12913_2020_5709_MOESM1_ESM.pdf]

**Additional file I Overview of programmes in the EPODE International Network**

| <b>NAME OF PROGRAMME</b>                                 | <b>COUNTRY</b>           | <b>PROGRAMME INFORMATION</b>                                                                                                                                                                                                                                                                                                                                                                                      |
|----------------------------------------------------------|--------------------------|-------------------------------------------------------------------------------------------------------------------------------------------------------------------------------------------------------------------------------------------------------------------------------------------------------------------------------------------------------------------------------------------------------------------|
| Basord                                                   | Bulgaria                 | <a href="http://www.basord.com/">http://www.basord.com/</a>                                                                                                                                                                                                                                                                                                                                                       |
| Camp Group                                               | Germany                  | <a href="http://camp-group.org/en/">http://camp-group.org/en/</a>                                                                                                                                                                                                                                                                                                                                                 |
| Cyprus Elementary School Intervention Program (CESIP)    | Cyprus                   | Not available                                                                                                                                                                                                                                                                                                                                                                                                     |
| ENERGIZE                                                 | New Zealand              | <a href="https://www.sportwaikato.org.nz/programmes/team-energize.aspx">https://www.sportwaikato.org.nz/programmes/team-energize.aspx</a>                                                                                                                                                                                                                                                                         |
| EPODE Flandre Lys                                        | France                   | <a href="https://www.cc-flandrelys.fr/">https://www.cc-flandrelys.fr/</a>                                                                                                                                                                                                                                                                                                                                         |
| Epode Umbria Region Obesity Intervention Study (EUROBIS) | Italy                    | <a href="https://www.eurobis.it/">https://www.eurobis.it/</a>                                                                                                                                                                                                                                                                                                                                                     |
| GYERE program                                            | Hungary                  | <a href="http://mdosz.hu/">http://mdosz.hu/</a>                                                                                                                                                                                                                                                                                                                                                                   |
| Healthy Kids                                             | Lebanon                  | <a href="https://youthhealthcommunity.com/meet-our-community/healthy-kids">https://youthhealthcommunity.com/meet-our-community/healthy-kids</a>                                                                                                                                                                                                                                                                   |
| Healthy Kids Bulgaria                                    | Bulgaria                 | Not available                                                                                                                                                                                                                                                                                                                                                                                                     |
| Healthy Kids Community Challenge                         | Canada                   | <a href="https://www.publichealthontario.ca/en/health-topics/health-promotion/child-youth-health/hkcc#:~:text=The%20Healthy%20Kids%20Community%20Challenge,health%20by%20promoting%20healthy%20behaviours.">https://www.publichealthontario.ca/en/health-topics/health-promotion/child-youth-health/hkcc#:~:text=The%20Healthy%20Kids%20Community%20Challenge,health%20by%20promoting%20healthy%20behaviours.</a> |
| Healthy Living Israel                                    | Israel                   | Not available                                                                                                                                                                                                                                                                                                                                                                                                     |
| Healthy Together Victoria                                | Australia                | Not available                                                                                                                                                                                                                                                                                                                                                                                                     |
| Healthy Traditions for Healthy Kids                      | Romania                  | Not available                                                                                                                                                                                                                                                                                                                                                                                                     |
| Healthy Weight for Life                                  | Malta                    | <a href="https://youthhealthcommunity.com/meet-our-community/healthy-weight-for-life">https://youthhealthcommunity.com/meet-our-community/healthy-weight-for-life</a>                                                                                                                                                                                                                                             |
| I'm Living Healthy Too! - SETS                           | Romania                  | <a href="http://sets.ro/ro/">http://sets.ro/ro/</a>                                                                                                                                                                                                                                                                                                                                                               |
| ISCA                                                     | Denmark                  | <a href="http://isca-web.org/english/home">http://isca-web.org/english/home</a>                                                                                                                                                                                                                                                                                                                                   |
| Jongeren Op Gezond Gewicht (JOGG)                        | The Netherlands          | <a href="https://jongerenopgezondgewicht.nl/">https://jongerenopgezondgewicht.nl/</a>                                                                                                                                                                                                                                                                                                                             |
| Keep Fit                                                 | Poland                   | Not available                                                                                                                                                                                                                                                                                                                                                                                                     |
| Montemorelos Adelante Con 5 Pasos                        | Mexico                   | Not available                                                                                                                                                                                                                                                                                                                                                                                                     |
| MUN-SI                                                   | Portugal                 | <a href="https://mun-si.com/">https://mun-si.com/</a>                                                                                                                                                                                                                                                                                                                                                             |
| Paideiatrofi                                             | Greece                   | Not available                                                                                                                                                                                                                                                                                                                                                                                                     |
| Petica-Play For Health                                   | Croatia                  | <a href="https://youthhealthcommunity.com/meet-our-community/condimentum-purus-parturient-pellentesque">https://youthhealthcommunity.com/meet-our-community/condimentum-purus-parturient-pellentesque</a>                                                                                                                                                                                                         |
| Project Spraoi                                           | Ireland                  | <a href="https://projectspraoi.cit.ie/">https://projectspraoi.cit.ie/</a>                                                                                                                                                                                                                                                                                                                                         |
| RiseVT                                                   | United States of America | <a href="https://risevt.org/">https://risevt.org/</a>                                                                                                                                                                                                                                                                                                                                                             |
| Salud Madrid                                             | Spain                    | Not available                                                                                                                                                                                                                                                                                                                                                                                                     |
| Salzburg Together Against Obesity (SALTO)                | Austria                  | <a href="https://www.salto-salzburg.at/">https://www.salto-salzburg.at/</a>                                                                                                                                                                                                                                                                                                                                       |
| SCOPE                                                    | Canada                   | <a href="https://www.live5210.ca/">https://www.live5210.ca/</a>                                                                                                                                                                                                                                                                                                                                                   |
| SPORTTUBE                                                | Slovakia                 | Not available                                                                                                                                                                                                                                                                                                                                                                                                     |
| SWEET                                                    | Northern Ireland         | Not available                                                                                                                                                                                                                                                                                                                                                                                                     |
| Tackling Childhood Obesity Together (TCOT)               | United Kingdom           | Not available                                                                                                                                                                                                                                                                                                                                                                                                     |
| The Obesity Prevention and Lifestyle (OPAL) Program      | Australia                | <a href="https://www.sahealth.sa.gov.au/wps/wcm/connect/public+content/sa+health+internet/healthy+living/healthy+communities/local+community/opal/opal">https://www.sahealth.sa.gov.au/wps/wcm/connect/public+content/sa+health+internet/healthy+living/healthy+communities/local+community/opal/opal</a>                                                                                                         |
| Viasano                                                  | Belgium                  | <a href="http://www.viasano.be/nl/">http://www.viasano.be/nl/</a>                                                                                                                                                                                                                                                                                                                                                 |
