# Supplementary material for: The training and support needs of 22 programme directors of community-based childhood obesity interventions based on the EPODE approach: an online survey across programmes in 18 countries
Source: PubMed Central journal article supplement (PMC7491184; doi:10.1186/s12913-020-05709-1), 2020-09-15
Supplement: 12913_2020_5709_MOESM2_ESM.pdf [file 12913_2020_5709_MOESM2_ESM.pdf]

## **Additional file II Online survey**

### **1 Characteristics of the program**

In this first section we ask you to describe the characteristics of the program in which you currently work. This will allow us to identify the support needs of specific kinds of programs. Note: if you are associated with more than one program, please choose the program with which you are most familiar.

Please provide contact information:

**VR1** Program name

**VR2** Your first and last name

**VR3** Email address

**VR4** Telephone number

**VR5** Country

**VR6** Commencement date of the program:

**VR7** What is the *main* setting in which the program operates?

**Label 1** Municipality (city, region, county)

**Label 2** School(system)

**Label 3** Health (hospital, primary care physicians, public health unit)

**Label 4** After school setting (sport club, youth club, YMCA, ...)

**Label 5** Other, please specify: **VR7\_ANW**

**VR8** Approximately, how many children have been reached by your program to date?

Under which authority [1] is the program operating? (please select all that apply)

**VR9A** National political authority

**VR9B** State or regional political authority

**VR9C** The local authority or branch of local government

**VR9D** School board

**VR9\_AN** Other, please specify: **VR9\_ANW**

At what stage of the program is the target population directly involved? (please select all that apply)

**VR10A** Planning

**VR10B** Implementation

**VR10C** Evaluation of actions/interventions

**VR10\_AN** Other, namely: **VR10\_ANW**

**VR10\_GVB** They are not involved in any stage

How is your target population involved? (please select all that apply)

**VR11A** Involved in the planning

**VR11B** Giving advice

**VR11C** Being consulted about plans

**VR11D** Providing resources

**VR11E** Program evaluation

**VR11\_AN** Other, namely: **VR11\_ANW**

Which stakeholder groups are actively involved in your community-based program? (please select all that apply)

**VR12A** Health Care Providers

**VR12B** Private sector partners - please specify: **VR13**

**VR12C** Local media

**VR12D** Sports clubs

**VR12\_AN** Other, namely: **VR12\_ANW**

People from which policy domains are actively collaborating in your community-based program?  
(please select all that apply)

**VR14A** Youth

**VR14B** Economy

**VR14C** Safety

**VR14D** Well-being

**VR14E** Health

**VR14F** Infrastructure/urbanization

**VR14G** Sports

**VR14H** Mental health, youth addiction

**VR14I** Parenting

**VR14\_AN** Other, namely: **VR14\_ANW**

How is your program funded? Please indicate the percentage of the total budget (please select all that apply)

**VR15A** Public government: ...%

**VR15B** Foundations ...%

**VR15C** Research grants ...%

**VR15D** Individual donations ...%

**VR15E** Private (industry) ...%

**VR15F** Other: namely: **VR15\_ANW** ...%

If Private (industry) what percentage of private funding comes from:

**VR16A** Food industry: ...%

**VR16B** Pharmaceutical: ...%

**VR16C** Bank, insurance company: ...%

**VR16D** Local business association ...%

**VR16E** Other, namely: **VR16\_ANW** ...%

**VR16F** I do not know

**VR16G** N/A

**2. Use & satisfaction with current support.**

At this moment the EPODE International Network (EIN) is already offering training and support. We would like to know how you feel about this support.

Did you use any initial training or support from EIN to operationalize the EPODE methodology? If so, please rate the usefulness of the support.

|                                                                             | Used?<br><b>No=label 1</b> | Not useful at<br>all <b>Label 2</b> | Not useful<br><b>Label 3</b> | Neutral<br><b>Label 4</b> | Useful<br><b>Label 5</b> | Very<br>useful<br><b>Label 6</b> |
|-----------------------------------------------------------------------------|----------------------------|-------------------------------------|------------------------------|---------------------------|--------------------------|----------------------------------|
| Consultants<br>visiting you on<br>site <b>VR17A</b>                         | Yes/no                     |                                     |                              |                           |                          |                                  |
| Meetings with<br>consultants at the<br>EIN office. <b>VR17B</b>             | Yes/no                     |                                     |                              |                           |                          |                                  |
| Visits to other EIN<br>operating<br>programs <b>VR17C</b>                   | Yes/no                     |                                     |                              |                           |                          |                                  |
| Workshops at an<br>EPODE obesity<br>forum <b>VR17D</b>                      | Yes/no                     |                                     |                              |                           |                          |                                  |
| Information from<br>EIN publications<br>and the EIN<br>website <b>VR17E</b> | Yes/no                     |                                     |                              |                           |                          |                                  |
| Other: <b>VR17F</b><br>namely:<br><b>VR17_ANW</b>                           | Yes/no                     |                                     |                              |                           |                          |                                  |

Did you use any ongoing support of EIN? If so, please rate the usefulness of the support.

|                                                                                    | Used?<br>No= <b>label 1</b> | Not useful at<br>all <b>Label 2</b> | Not useful<br><b>Label 3</b> | Neutral<br><b>Label 4</b> | Useful<br><b>Label 5</b> | Very<br>useful<br><b>Label 6</b> |
|------------------------------------------------------------------------------------|-----------------------------|-------------------------------------|------------------------------|---------------------------|--------------------------|----------------------------------|
| Program Information<br>via website <b>VR18A</b>                                    | Yes/no                      |                                     |                              |                           |                          |                                  |
| Attendance at EPODE<br>Obesity Forums (GOF,<br>EOF, ECOF, ...[2])<br><b>VR218B</b> | Yes/no                      |                                     |                              |                           |                          |                                  |
| Presentations <b>VR18C</b>                                                         | Yes/no                      |                                     |                              |                           |                          |                                  |
| Formal workshops or<br>webinars <b>VR18D</b>                                       | Yes/no                      |                                     |                              |                           |                          |                                  |
| Networking with other<br>program managers<br><b>VR18E</b>                          | Yes/no                      |                                     |                              |                           |                          |                                  |
| Phone(Skype) or email<br>support from EIN<br>coordinators <b>VR18F</b>             | Yes/no                      |                                     |                              |                           |                          |                                  |
| Information from EIN<br>publications and the<br>EIN website <b>VR18G</b>           | Yes/no                      |                                     |                              |                           |                          |                                  |
| Other: <b>VR18H</b> namely:<br><b>VR18_ANW</b>                                     | Yes/no                      |                                     |                              |                           |                          |                                  |

**VR19** If relevant, cite an event or form of support that was particularly useful, and why.

**VR20** If relevant, cite an event that was particularly disappointing, and why.

What additional offerings would you find useful? (please select all that apply)

**VR21A** A program operational handbook for managers: Process documentation (manual)

**VR21B** Program self-audit with supporting documentation

**VR21C** Online training packages

**VR21D** FAQ's e.g. a list of frequently asked questions

**VR21E** More operational training opportunities at Forums

**VR21F** Templates for reporting, budgeting etc.

**VR21G** A program evaluation handbook and guide.

**VR21H** Regular online forums such as Webex for exchanging information with other program managers

**VR21\_AN** Other, namely: **VR21\_ANW**

**VR21\_GVB** All we need is available right now

### 3. Developing a new learning center

EPODE International Network (EIN) is considering establishing a formal training capability in collaboration with JOGG (the Netherlands). In this section we ask your opinion about some preliminary ideas for the support to be offered to both new and ongoing programs based on the EPODE Methodology:

Please rate the potential usefulness of these new training options for new programs:

|                                                                                                                                                                                                                                        | Not<br>useful<br>at all<br><b>Label<br/>1</b> | Not<br>useful<br><b>Label<br/>2</b> | Neutral<br><b>Label 3</b> | Useful<br><b>Label<br/>4</b> | Very useful<br><b>Label 5</b> |
|----------------------------------------------------------------------------------------------------------------------------------------------------------------------------------------------------------------------------------------|-----------------------------------------------|-------------------------------------|---------------------------|------------------------------|-------------------------------|
| Participating in an intensive 2 week EPODE training program at JOGG (the Netherlands) or associated institute, including on site interaction with the JOGG program and periodic monthly follow ups over a 12 month period <b>VR22A</b> |                                               |                                     |                           |                              |                               |
| Accessing an online training program (MOOC – to be developed) <b>VR22B</b>                                                                                                                                                             |                                               |                                     |                           |                              |                               |
| Training by one or two consultants at your site – usually for a period of 3 – 5 days followed by phone or email coaching <b>VR22C</b>                                                                                                  |                                               |                                     |                           |                              |                               |

Please rate the potential usefulness of these training options for upgrading skills when you are already operating along the EPODE methodology:

|                                                                                                                                                                                                                                                      | Not<br>useful<br>at all<br><b>Label<br/>1</b> | Not<br>useful<br><b>Label<br/>2</b> | Neutral<br><b>Label 3</b> | Useful<br><b>Label<br/>4</b> | Very useful<br><b>Label 5</b> |
|------------------------------------------------------------------------------------------------------------------------------------------------------------------------------------------------------------------------------------------------------|-----------------------------------------------|-------------------------------------|---------------------------|------------------------------|-------------------------------|
| Participating in an intensive one week EPODE refresher training program at JOGG or associated institute, including: program audit, interaction with the JOGG program communities and periodic monthly follow ups over a 12 month period <b>VR23A</b> |                                               |                                     |                           |                              |                               |
| Accessing an online refresher training program (MOOC) <b>VR23B</b>                                                                                                                                                                                   |                                               |                                     |                           |                              |                               |
| Completing a program audit followed by a custom training program offered by one or two consultants at your site – usually for a period of 3 – 4 days on site followed by telephone or email assistance <b>VR23C</b>                                  |                                               |                                     |                           |                              |                               |
| Attending an intensive two-day training workshop preceding an EPODE Obesity Forum <b>VR23D</b>                                                                                                                                                       |                                               |                                     |                           |                              |                               |
| A course of training and workshops that would lead to a certification (Diploma) as a community-based-program expert <b>VR23E</b>                                                                                                                     |                                               |                                     |                           |                              |                               |

Please rate the potential usefulness of the following areas of training and support:

|                                                                                                                | Not<br>at all<br>useful<br><b>Label<br/>1</b> | Not<br>useful<br><b>Label 2</b> | Neutral<br><b>Label 3</b> | Useful<br><b>Label<br/>4</b> | Very<br>useful<br><b>Label 5</b> |
|----------------------------------------------------------------------------------------------------------------|-----------------------------------------------|---------------------------------|---------------------------|------------------------------|----------------------------------|
| Skills in obtaining Political commitment at all levels <b>VR24A</b>                                            |                                               |                                 |                           |                              |                                  |
| Program branding, obtaining local visibility and using social media to build communities online <b>VR24B</b>   |                                               |                                 |                           |                              |                                  |
| Applying behavior change theory for more effective interventions <b>VR24C</b>                                  |                                               |                                 |                           |                              |                                  |
| Assessing community needs and engaging community stakeholders <b>VR24D</b>                                     |                                               |                                 |                           |                              |                                  |
| Principles and practical application of social marketing <b>VR24E</b>                                          |                                               |                                 |                           |                              |                                  |
| Managing public-private partnerships <b>VR24F</b>                                                              |                                               |                                 |                           |                              |                                  |
| Monitoring, measuring and program evaluation <b>VR24G</b>                                                      |                                               |                                 |                           |                              |                                  |
| Linking care (secondary prevention) and primary prevention <b>VR24H</b>                                        |                                               |                                 |                           |                              |                                  |
| Designing Environmental (built) interventions <b>VR24I</b>                                                     |                                               |                                 |                           |                              |                                  |
| Operational issues: annual plans, budgeting, hiring, motivating staff and volunteers <b>VR24J</b>              |                                               |                                 |                           |                              |                                  |
| Gaining Parental involvement <b>VR24K</b>                                                                      |                                               |                                 |                           |                              |                                  |
| Best Practices in intervention design and delivery e.g. how to design a “drink more water” action <b>VR24L</b> |                                               |                                 |                           |                              |                                  |
| Promoting and publishing program results <b>VR24M</b>                                                          |                                               |                                 |                           |                              |                                  |
| Fund raising techniques and proposal writing <b>VR24N</b>                                                      |                                               |                                 |                           |                              |                                  |
| Other suggestions <b>VR24O</b> , namely:<br><b>VR24_ANW</b>                                                    |                                               |                                 |                           |                              |                                  |

#### 4. Budget

**VR25** Would your program be willing to pay for the services delivered by Epode at a cost-recovery basis?

**Label 1** Yes, depending on the price and if it is affordable.

**Label 2** No

**Label 3** I do not know

**VR26** Does your program have a training budget?

**Label 1** Yes

**Label 2** No

**Label 3** I do not know

**VR27** Approximately, how much money (euro) per year do you spend on average on training? .. euro

**Label 999** I do not know

Please indicate how much you agree or disagree with the following statements

|                                                                                                                                                         | Totally agree<br><b>Label 1</b> | Agree <b>Label 2</b> | Neutral<br><b>Label 3</b> | Disagree<br><b>Label 4</b> | Totally disagree<br><b>Label 5</b> |
|---------------------------------------------------------------------------------------------------------------------------------------------------------|---------------------------------|----------------------|---------------------------|----------------------------|------------------------------------|
| We organise our own training and do not consider it a necessary expense to have someone else do it. <b>VR28A</b>                                        |                                 |                      |                           |                            |                                    |
| Training to achieve a sound foundation in all aspects of community-based program management should be included in every program budget. <b>VR28B</b>    |                                 |                      |                           |                            |                                    |
| It is important for us to continually upgrade our skills and learn how to make our community-based program more effective and sustainable. <b>VR28C</b> |                                 |                      |                           |                            |                                    |
| We get all the guidance we need at the annual EPODE Forum. I can't see the need for additional training. <b>VR28D</b>                                   |                                 |                      |                           |                            |                                    |
| A certification program for our local and overall program manager would give us and our funders confidence that we are on the right track. <b>VR28E</b> |                                 |                      |                           |                            |                                    |
| We appreciate the value of training but we're often too busy just running our program <b>VR28F</b>                                                      |                                 |                      |                           |                            |                                    |

## 5. Useful existing instruments, facilities and documents

To improve the knowledge and skills in the field we are looking for good examples that are used in practice. In this section we ask you to inform us about such tools that could be shared with the network.

**VR29** Do you use manuals, forms, reports, charts or other devices that are useful for daily practice and would you be willing to share these with other EIN programs?

**Label 1** yes we use such devices, and I am willing to share

**Label 2** yes, we use such devices, but they are proprietary and we cannot share them

**Label 3** no, we do not use such devices

**Label 4** I do not know

If yes, please provide contact information so we can contact you.

**VR30A** Same as 1a

if different from 1a:

**VR31** Name / **VR32** Email address / **VR33** Telephone

## 6. Collaboration

**VR34** We intend to collaborate closely with the EIN member programs in the development of an EPODE Academy. Would you be willing to be an EPODE Academy advisor and collaborate in the development of the EPODE Academy?

**Label 1** Yes

**Label 2** No

If yes, please provide contact information of a person in your organization who would be willing to actively contribute to this development:

**VR35** Name

**VR436** Email address

**VR437** Telephone

## **7. Any remarks**

**VR39** Is there any other information or advice that you consider to be relevant and that is not covered by the above questions?

## **VR 40 Thank you for your time and contribution.**

---

[1] By authority we mean the jurisdiction that is responsible for supporting the central coordination of your program.

[2] Global Obesity Forum (New York); European Obesity Fora: Amsterdam, Brussels, Lisbon, Bucharest; Epode Canadian Obesity Fora.

---
